# Supplementary material
Source: PubMed Central journal article supplement (PMC5726369)
Supplement: EHP289.s001.acco.pdf [file EHP289.s001.acco.pdf]

**Note to readers with disabilities:** *EHP* strives to ensure that all journal content is accessible to all readers. However, some figures and Supplemental Material published in *EHP* articles may not conform to [508 standards](#) due to the complexity of the information being presented. If you need assistance accessing journal content, please contact [ehp508@niehs.nih.gov](mailto:ehp508@niehs.nih.gov). Our staff will work with you to assess and meet your accessibility needs within 3 working days.

## **Supplemental Material**

# **Effects of Prenatal PM<sub>10</sub> Exposure on Fetal Cardiovascular Malformations in Fuzhou, China: A Retrospective Case-Control Study**

Chao-Bin Liu, Xin-Ru Hong, Miao Shi, Xiao-Qiu Chen, Hui-Juan Huang, Jin-Hua Chen, Kai Yang, Su-Qing Chen, Han-Qiang Chen, Hai-Dong Kan, and Qing-Hua Sun

### **Table of Contents**

**Table S1.** Prevalence of fetal anomalies (Fuzhou 2007-2013)

**Table S2.** Type and prevalence of fetal anomaly groupings from a total birth population of 110,720 in Fuzhou between 2007 and 2013

**Table S3.** Demographic characteristics of the study participants (Total number or mean  $\pm$  SD)

**Table S1 Prevalence of fetal anomalies (Fuzhou 2007-2013)**

| Year | Total birth | Fetal anomalies | Prevalence<br>(Fetal anomalies/<br>Total birth, %) |
|------|-------------|-----------------|----------------------------------------------------|
| 2007 | 15,352      | 196             | 0.177                                              |
| 2008 | 15,587      | 205             | 0.185                                              |
| 2009 | 14,964      | 186             | 0.168                                              |
| 2010 | 15,748      | 231             | 0.209                                              |
| 2011 | 16,441      | 252             | 0.228                                              |
| 2012 | 16,848      | 268             | 0.242                                              |
| 2013 | 15,780      | 246             | 0.222                                              |
| Sam  | 110,720     | 1,584           | 1.431                                              |

**Table S2 Type and prevalence of fetal anomaly groupings from a total birth population of 110,720 in Fuzhou between 2007 and 2013**

| Type of anomalies                     | Number | Prevalence<br>(Type/Total birth<br>population, %) | Ratio (Type<br>/Total, %) |
|---------------------------------------|--------|---------------------------------------------------|---------------------------|
| Cardiovascular system                 | 700    | 0.632                                             | 44.2                      |
| Face and neck                         | 198    | 0.179                                             | 12.5                      |
| Nervous system                        | 167    | 0.151                                             | 10.5                      |
| Genitourinary tract                   | 136    | 0.123                                             | 8.6                       |
| Osseous system                        | 128    | 0.116                                             | 8.1                       |
| Thoracic cavity and<br>abdominal wall | 75     | 0.068                                             | 4.7                       |
| Digestive system                      | 65     | 0.059                                             | 4.1                       |
| Multiorgans                           | 56     | 0.051                                             | 3.5                       |
| Others                                | 59     | 0.053                                             | 3.7                       |
| Total                                 | 1,584  | 1.431                                             | 100.0                     |

**Table S3 Demographic characteristics of the study participants****(Total number or mean  $\pm$  SD)**

| Characteristics of participants     | Controls       | Cases          |
|-------------------------------------|----------------|----------------|
| Number                              | 3,972          | 662            |
| Age (years, mean $\pm$ SD)          | 27.5 $\pm$ 3.4 | 27.3 $\pm$ 3.6 |
| Parity                              |                |                |
| 0                                   | 3,677          | 603            |
| 1                                   | 271            | 51             |
| 2+                                  | 24             | 8              |
| Education                           |                |                |
| $\leq$ primary school               | 178            | 42             |
| junior or senior high school        | 1,691          | 263            |
| $\geq$ college                      | 2,103          | 357            |
| Beginning of prenatal care          |                |                |
| First trimester                     | 3,731          | 614            |
| Second trimester                    | 160            | 34             |
| Third trimester                     | 37             | 3              |
| No care                             | 44             | 11             |
| prenatal folic acid and vitamin use |                |                |
| Yes                                 | 3,655          | 606            |
| No                                  | 317            | 56             |
| Season of conception                |                |                |
| Warm (May–October)                  | 1,971          | 338            |
| Cool (November–April)               | 2,001          | 324            |
| Marital status                      |                |                |
| Married                             | 3,959          | 660            |
| Unmarried                           | 12             | 1              |
| Divorced                            | 1              | 1              |
| Loss of spouse                      | 0              | 0              |
| Residential site                    |                |                |
| Within built-up region              | 3,819          | 638            |
| Outside built-up region             | 153            | 24             |
